# Supplementary material
Source: bioRxiv or medRxiv preprint supplement (http://www.biorxiv.org/highwire/filestream/14864/field_highwire_adjunct_files/0/036822-1.pdf)
Supplement: Supplementary file [file 036822-1.pdf]

## Differential methylation between ethnic sub-groups reflects the effect of genetic ancestry and environmental exposures: SI Appendix

Joshua M. Galanter, MD, MAS, Christopher R. Gignoux, PhD, Sam S. Oh, PhD, Dara Torgerson, PhD, Maria Pino-Yanes, PhD, Neeta Thakur, MD, MPH, Celeste Eng, BS, Donglei Hu, PhD, Scott Huntsman, MS, Harold J. Farber, MD, Pedro C Avila, MD, Emerita Brigino-Buenaventura, MD, Michael A LeNoir, MD, Kelly Meade, MD, Denise Serebrisky, MD, William Rodríguez-Cintrón, MD, Rajesh Kumar, MD, Jose R Rodríguez-Santana, MD, Max A. Seibold, PhD, Luisa N. Borrell, DDS, PhD, Esteban G. Burchard, MD, MPH, Noah Zaitlen, PhD

### 1 **SI Appendix Text**

#### 2 **Results**

3 Differences in methylation by ethnicity

4 To explore the effect of departures from a linear association between ancestry and

5 methylation, we incorporated both higher order polynomials and cubic splines of

6 ancestry into our models. We observed a significant departure from linearity ( $p < 0.05$ )

7 in only 26 (for splines) and 25 (for polynomials) of the 314 CpG's where an association

8 between ethnicity and methylation remained after adjusting for ancestry; however, the

9 association between ethnicity and methylation remained even after adjusting for non-

10 linearity at all sites [SI Appendix Tables 3 and 4].

11 While most population substructure in Latinos would be expected to arise from

12 differences in continental ancestry<sup>1,2</sup>, there is evidence of finer scale (sub-continental)

13 ancestry in Latino populations<sup>3</sup>. We tested for the effect of fine scale substructure by

14 calculating principal components for all participants with genotyping data using  
15 Eigensoft<sup>4</sup>. We found significant associations between principal components 3-10 (PC's  
16 1 and 2 were almost perfectly collinear with ancestry, with an adjusted  $R^2 > 0.998$  for all  
17 three ancestry proportions, and were therefore excluded) and ethnicity. We therefore  
18 added these 8 PC's to models of ethnicity and methylation, and found an association  
19 between these genetic PC's and methylation in 63/314 CpG's that had remained  
20 associated with ethnicity after adjusting for ancestry. Adjusting for higher order  
21 substructure in these CpG's explained the association between ethnicity and  
22 methylation in 51 additional loci. This left 263 loci associated with ethnicity after  
23 adjustment for ancestry where there was either no association between PC's 3-10 and  
24 methylation or the inclusion of these PC's did not affect the association between  
25 ethnicity and methylation.[SI Appendix Table 5]

26 As only 16 participants self-identified as "Mixed Latino", we performed a sensitivity  
27 analysis to test the effect of excluding these participants from the analysis and only  
28 examining Puerto Ricans, Mexicans, and "Other Latinos". We found that excluding self-  
29 identified "Mixed Latino" participants from the analysis did not significantly alter the  
30 results in most cases [SI Appendix Table 6]. Of the 916 CpG's associated with ethnicity  
31 at a genome-wide scale ( $p < 1.6 \times 10^{-7}$ ) in models including individuals self-identified as  
32 "Mixed Ethnicity", 894 (97.5%) were still significant at a genome-wide scale when  
33 "Mixed Latinos" were excluded. All but two of the CpG's that did not meet genome-wide  
34 significance were significant when correcting for 916 tests ( $p < 5 \times 10^{-5}$ ). In addition, an  
35 additional 290 CpG loci that did not meet genome-wide significance in the original  
36 analysis were significant at a genome-wide scale when self-identified "Mixed Latinos"  
37 were excluded. While these loci did not meet genome-wide significance in the original

38 analysis that included Mixed Latinos, they all had p-values lower than  $2 \times 10^{-6}$ . Thus we  
39 conclude that a sensitivity test excluding individuals of mixed Latino ethnicity did not  
40 significantly alter the conclusions.

41 Environmental differences between geographic locations or recruitment sites are a  
42 potential non-genetic explanation for ethnic differences in methylation. We investigated  
43 the independent effect of recruitment site on methylation by analyzing the associations  
44 between recruitment site and individual methylation loci after adjusting for ethnicity.  
45 We did not find any loci significantly associated with recruitment site at a significance  
46 threshold of  $1.6 \times 10^{-7}$ . We then performed an analysis to assess the effect of recruitment  
47 sites on methylation stratified by ethnicity. We did not find any loci significantly  
48 associated with recruitment site and methylation among Mexican participants. We were  
49 underpowered to perform a similar analysis for Puerto Ricans because there were only  
50 27 Puerto Rican participants recruited outside of Puerto Rico. To ensure that the  
51 absence of association in Mexicans was not due to the loss of power from the smaller  
52 sample size, we repeated our analysis of the association between ethnicity and ancestry  
53 randomly down-sampling to 276 participants to match the sample size in the analysis of  
54 geography in Mexicans. While down-sampling the study to this degree resulted in a loss  
55 of power, 128 methylation sites were still associated with ancestry. We conclude that  
56 recruitment site was unlikely to be a significant confounder of our associations between  
57 ethnicity and methylation and was not a significant independent predictor of  
58 methylation.

59 Ethnic differences in environmentally-associated methylation sites  
60 In an earlier study of maternal smoking in Norwegian newborns<sup>5</sup> that identified 26 loci  
61 associated with maternal smoking during pregnancy, 19 passed quality control (QC) in

62 our own analysis, and the association between methylation and ethnicity was found to  
63 be nominally significant ( $p < 0.05$ ) at 6 (31.6%) CpG loci. Adjusting for 19 tests ( $p <$   
64  $.0026$ ), cg23067299 in the aryl hydrocarbon receptor repressor (*AHRR*) gene on  
65 chromosome 5 remained statistically significant [SI Appendix Table 8]. These results  
66 suggest that ethnic differences in methylation at loci known to be responsive to tobacco  
67 smoke exposure *in utero* may be explained in part by ethnic-specific differences in the  
68 prevalence of maternal smoking during pregnancy.

69 We also found that CpG loci previously reported to be associated with diesel-exhaust  
70 particle (DEP) exposure<sup>6</sup> were significantly enriched among the set of loci whose  
71 methylation levels varied between ethnic groups. Specifically, of the 101 CpG sites that  
72 were significantly associated with exposure to DEP and passed QC in our dataset, 31  
73 were nominally associated with ethnicity ( $p < 0.05$ ), and 5 were associated with  
74 ethnicity after adjusting for 101 comparisons ( $p < 0.005$ ). Finally, we found that  
75 methylation levels at cg11218385 in the pituitary adenylate cyclase-activating  
76 polypeptide type I receptor gene (*ADCYAP1R1*), which had been associated with  
77 exposure to violence in Puerto Ricans<sup>7</sup> and with heavy trauma exposure in adults<sup>8</sup>, was  
78 significantly associated with ethnicity ( $p = 0.02$ ).

79 Admixture mapping of methylation

80 We repeated the admixture mapping analysis using methylation beta values [methylated  
81 / (methylated + unmethylated)] instead of methylation M-values [ $\log_2(\beta / (1 - \beta))$ ]. We  
82 report these results in SI Appendix Table 11 and note that they did not significantly alter  
83 our findings; 3695 loci were associated with local ancestry, compared to 3694 when the  
84 analysis was done on the methylation M scale. The most significantly associated CpG in  
85 the admixture mapping analysis remained cp04922029 on the Duffy Locus, with a p-

86 value of  $4 \times 10^{-152}$ , only slightly less significant than the  $6 \times 10^{-162}$  significance level  
87 found for that locus using methylation M-value. Each increase in African ancestry was  
88 associated with an increase in methylation  $\beta$  of 0.37.

89 We also repeated the mQTL analysis using methylation  $\beta$  values instead of M-values in  
90 SI Appendix Table 12. Of the 3694 loci significantly associated with local ancestry, 3631  
91 (98.3%) have at least one SNP within 1 Mb that is significantly associated with  
92 methylation levels (after adjustment of the number of SNPs in cis-), compared to 3637  
93 loci when the analysis was performed with M-values. The most significant SNP-CpG  
94 pair was cg17857094/KG\_6\_31014327 (rs56366011), which has a p-value of  $10^{-354}$ ; each  
95 copy of the C allele was associated with a decrease in methylation  $\beta$  of 0.31. The  
96 cp04922029/rs2814778 was also highly significant, but not as significant as in the  
97 original analysis; the p-value was  $2 \times 10^{-65}$ ; each copy of the T allele was associated with  
98 an increase of methylation  $\beta$  of 0.20.

## 99 SI Appendix Methods

### 100 Recruitment

101 A total of 4,702 children (2,374 participants with asthma and 2,328 healthy controls)  
102 were recruited from five centers (Chicago, Bronx, Houston, San Francisco Bay Area, and  
103 Puerto Rico) using a combination of community- and clinic-based recruitment.

104 Participants were eligible if they were 8-21 years of age and self-identified as a specific  
105 Latino ethnicity and had four Latino grandparents. Asthma cases were defined as  
106 participants with a history of physician diagnosed asthma and the presence of two or  
107 more symptoms of coughing, wheezing, or shortness of breath in the 2 years preceding  
108 enrollment. Participants were excluded if they reported any of the following: (1) 10 or

109 more pack-years of smoking; (2) any smoking within 1 year of recruitment date; (3)  
110 history of lung diseases other than asthma (cases) or chronic illness (cases and  
111 controls); or (4) pregnancy in the third trimester. Further details of recruitment are  
112 described elsewhere<sup>9</sup>. Latino sub-ethnicity was determined by self-identification and the  
113 ethnicity of the their four grandparents. Due to small numbers, ethnicities other than  
114 Puerto Rican and Mexican were collapsed into a single category, “other Latino”.  
115 Participants whose four grandparents were of discordant ethnicity were considered to  
116 be of “mixed Latino” ethnicity.

117 Trained interviewers, proficient in both English and Spanish, administered  
118 questionnaires to gather baseline demographic data, as well as information on general  
119 health, asthma status, acculturation, social, and environmental exposures.

120 Methylation

121 1 µg of gDNA was bisulfite-converted using the Zymo EZ DNA Methylation Kit™ (Zymo  
122 research, Irvine, CA) according to the manufacturer’s instructions. Bisulfite converted  
123 DNA was isothermally amplified overnight, enzymatically fragmented, precipitated, and  
124 re-suspended in hybridization buffer. The fragmented, re-suspended DNA samples were  
125 dispensed onto Infinium HumanMethylation450 BeadChips and incubated overnight  
126 in an Illumina hybridization oven. Following hybridization, free DNA was washed away,  
127 and the BeadChips were extended through single nucleotide extensions with fluorescent  
128 labels. The BeadChips were imaged using an Illumina iScan system, and processed using  
129 the Illumina GenomeStudio Software.

130 Failed probes were identified using detection p-values using Illumina’s  
131 recommendations. Probes on sex chromosomes and those known to contain genetic

132 polymorphisms in the probe sequence were also excluded, leaving 321,503 probes for  
133 analysis. Raw data were normalized using Illumina's control probe scaling procedure.  
134 Beta values of methylation (ranging from 0 to 1) were converted to M-values via a logit  
135 transformation<sup>10</sup>.

#### 136 Genotyping

137 Participants were genotyped at 818,154 SNPs on the Axiom® Genome-Wide LAT 1,  
138 World Array 4 (Affymetrix, Santa Clara, CA)<sup>11</sup>. We removed SNPs with >5% missing data  
139 and failing platform-specific SNP quality criteria (n=63,328), along with those out of  
140 Hardy-Weinberg equilibrium (n=1845;  $p < 10^{-6}$ ) within their respective populations  
141 (Puerto Rican, Mexican, and other Latino), as well as non-autosomal SNPs. Subjects  
142 were filtered based on 95% call rates and sex discrepancies, identity by descent and  
143 standard Affymetrix Axiom metrics. The total number of participants passing QC was  
144 3,804 (1,902 asthmatic cases, 1,902 healthy controls), and the total number of SNPs  
145 passing QC was 747,129. The number of participants with both methylation and  
146 genotyping data was 524.

#### 147 Ancestry and PCA calculations

148 GALA II participants were combined with ancestral data from 1000 Genomes European  
149 (CEU) and African (YRI) populations and 71 Native American (NAM) samples  
150 genotyped on the Axiom® Genome-Wide LAT 1 array. A final sample of 568,037  
151 autosomal SNPs with relevant ancestral data was used to estimate local and global  
152 ancestry. Global ancestry was estimated using the program ADMIXTURE<sup>12</sup>, with a three  
153 population model. Local ancestry at all positions across the genome was estimated using  
154 the program LAMP-LD<sup>13</sup>, assuming three ancestral populations.

155 Principal components for the genetic data were determined using the program  
156 EIGENSTRAT<sup>4</sup>.

157 Statistical Analyses

158 Multidimensional scaling of the logit transformed methylation data (M-values) was  
159 performed by first calculating the Euclidian distance matrix between each pair of  
160 individuals and then calculating the first 10 principal coordinates of the data [SI  
161 Appendix Figure 2A]. We performed both a simple correlation analysis of these  
162 principal coordinates to demographic factors (age, sex, ethnicity), estimated cell counts  
163 and technical factors (batch, plate, and position) to identify factors that correlated with  
164 global methylation patterns [see SI Appendix Figure 2B]. In addition, we performed a  
165 multiple regression analysis of methylation principal coordinates by ethnicity and  
166 ancestry, adjusting for case status, age, sex, estimated cell counts, and plate and position  
167 [SI Appendix Table 1].

168 We also sought to establish the extent to which global differences in methylation  
169 between Puerto Ricans and Mexicans could be explained by differences in ancestry  
170 between the two groups. We estimated the proportion of the ethnicity association that  
171 was mediated by genomic ancestry using the R package “mediation”<sup>14</sup> for methylation  
172 principal coordinates, which demonstrated a significant association with ethnicity.

173 We also sought to correlate ethnicity and methylation at a locus-specific level. We thus  
174 performed a linear regression between methylation at each CpG site and self-reported  
175 ethnicity (Mexican, Puerto Rican, Mixed Latino, and Other Latino), followed by a three  
176 degree of freedom analysis of variance to determine the overall effect of ethnicity on  
177 methylation We repeated the analysis excluding the 16 participants that were self-



178 described as “Mixed Latino”, and tested for non-linearity in two ways: by adding second  
179 and third order polynomials to the model, and by adding a 3-degree of freedom cubic  
180 spline and comparing models with the non-linear terms to those without using a nested  
181 ANOVA. At loci where there was evidence for non-linearity, we tested whether ethnicity  
182 remained associated with methylation after adjusting for ancestry as well as the  
183 deviations from linearity. Finally, we tested for the presence of population sub-  
184 structure beyond that conveyed through ancestry by adding the genetic principal  
185 components 3-10 (PCs 1 and 2 were co-linear with ancestry with a correlation coefficient  
186  $R^2 > 0.998$ ) and comparing models with those PCs to those without. At loci where there  
187 was evidence for association between PC’s 3-10 and methylation, we tested whether  
188 ethnicity remained associated with methylation after adjusting for ancestry as well as  
189 the PC’s 3-10.

190 We calculated the proportion of variance in methylation explained by ethnicity and  
191 genomic ancestry at each site where ethnicity was significantly associated with  
192 methylation. To do this, we fit a model that included both ethnicity and global ancestry  
193 as well as the confounders described above and calculated the proportion of variance  
194 explained by multiplying the ratio of the variance between predictors (ethnicity and  
195 genomic ancestry) and outcome (methylation) by the square of the effect magnitude ( $\beta$ ).

196 We also examined whether differences in methylation patterns by ethnicity could be  
197 associated with known loci that had previously been reported to vary based on common  
198 environmental exposures, including maternal smoking during pregnancy<sup>5</sup>, diesel  
199 exhaust particles (DEP)<sup>6</sup>, and exposure to violence<sup>7</sup>. We have previously shown that

200 exposure to these common environmental exposures or similar exposures varied by  
201 ethnicity within our own GALA II study populations<sup>9,15,16</sup>.

202 In addition, we examined the association between global ancestry and methylation  
203 across all CpG loci using a two-degree of freedom likelihood ratio test as well as by  
204 examining the association between individual ancestral components (African,  
205 European, and Native American) and methylation at each CpG site. At each site where  
206 methylation was significantly associated with genomic ancestry proportions, we  
207 determined the relative effect of global ancestry ( $\theta$ , theta) and local ancestry ( $\gamma$ , gamma)  
208 in a joint model by calculating the proportion of variance explained as above.

209 To determine whether ancestry associations with methylation were due to variation in  
210 local ancestry, we performed a cis-admixture mapping study, comparing estimates of  
211 local ancestry at each CpG site with methylation at the site. Because ancestry LD is  
212 much stronger than genotypic LD, it is possible to accurately interpolate ancestry at  
213 each CpG site based on the ancestry estimated at the nearest SNPs<sup>17,18</sup>. Measures of  
214 locus-specific ancestry were correlated with local methylation using linear regression.  
215 We performed a two-degree of freedom analysis of variance test evaluating the overall  
216 effect of all three ancestries as well as single-ancestry associations comparing  
217 methylation at a given locus with the number of African, European and Native American  
218 chromosomes at that CpG site.

219 In order to determine the extent to which admixture mapping results could be explained  
220 by allelic associations, we performed a meQTL analysis at all Bonferroni-corrected  
221 significant admixture mapping associations ( $p < 1.6 \times 10^{-7}$ ), by comparing methylation at  
222 a given locus with the genotype of SNPs within 1 MB of the CpG site using an additive

223 genotypic model, adjusted for both global and local genomic ancestry, demographic  
224 variables including ethnicity, estimated cell proportions, case status, and technical  
225 factors. The significance threshold was based on Bonferroni correction for the number  
226 of SNPs within 1 MB of the CpG site.

## 227 SI Appendix Figures

228 **SI Appendix Figure 1:** Ancestry estimates for GALA II participants, by ethnic group.  
229 Mexicans, on average, had a greater proportion of Native American ancestry than Puerto  
230 Ricans; Puerto Ricans had a greater proportion of European and African ancestry.  
231 Mixed and other Latinos were intermediate.

232 **SI Appendix Figure 2:** [A] Distribution of the first 10 principal coordinates of the  
233 methylation data. Plots in the diagonal show the univariate distribution; those in the  
234 lower left triangle show bivariate relationship between each pair of PCs, while those in  
235 the upper right show the bivariate density. [B] Bivariate or ANOVA associations  
236 between principal coordinates and technical factors (chip, position), cell counts, genetic  
237 ancestry (European, Native American, African), recruitment site (New York, NY, San  
238 Francisco, CA, Chicago, IL, Houston, TX, and Puerto Rico), demographic factors  
239 (ethnicity, age, sex), and case status. [C] Correlation coefficients between the various  
240 factors and principal coordinates.

241 **SI Appendix Figure 3:** [A] Association between ethnicity and principal coordinate 7.  
242 [B] Association between Native American ancestry proportion and PC7, colored by  
243 ethnicity. Native American ancestry explains approximately 81% of the association  
244 between PC7 and ethnicity.

245 **SI Appendix Figure 4:** Relationship between genomic ancestry and the association  
246 between ethnicity and methylation. [A] Venn diagram showing the effect of adjustment  
247 for ancestry on the association between ethnicity and methylation. The components of  
248 the diagram represent the number of CpG's that remained associated with ethnicity  
249 after adjustment for ancestry and the number of CpG's that were associated with  
250 ancestry. [B] Relative proportion of variance in methylation explained by ethnicity and

251 genomic ancestry across loci significantly associated with ethnicity. Mediation analysis  
252 of associations between ethnicity and methylation M-values for [C] Native American  
253 ancestry and [D] African ancestry. For simplicity, only significant mediation effects are  
254 shown.

255 **SI Appendix Figure 5:** [A] Manhattan plot showing the associations between  
256 genomic ancestry and methylation at individual CpG loci. [B] Plot showing one such  
257 locus, cg04922029, and genomic African ancestry, showing a strong correlation  
258 between African ancestry and hypermethylation at that site.

259 **SI Appendix Figure 6:** Relative proportion of variance in methylation explained by  
260 global and local ancestry across loci significantly associated with global ancestry.

261 **SI Appendix Figure 7:** [A] Violin plot showing the association between cg25134647  
262 on chromosome 12 and European ancestry at the locus. [B] Association between SNPs  
263 located within 1Mb of cg25134647 and methylation levels at that CpG. [C] Association  
264 between rs4963867 genotype and methylation at cg25134647, color coded by the  
265 number of European alleles present. There is near perfect correlation between genotype  
266 and methylation at the locus. [D] Allele frequency of cg25134647 by 1000 Genomes  
267 population. The C allele is more common in African populations than in other  
268 populations.

## 269 SI Appendix Tables

270 **SI Appendix Table 1:** Correlation between methylation principal components and  
271 both ethnicity and ancestry, association between ethnicity and methylation adjusted for  
272 ancestry, and mediation of the association between ethnicity and methylation by  
273 ancestry.

274 **SI Appendix Table 2:** Significant associations between ethnicity and methylation ( $p <$   
275  $1.6 \times 10^{-7}$ ), and effect of adjustment for ancestry on the association of ethnicity and  
276 methylation.

277 **SI Appendix Table 3:** Effect of adding cubic spline ancestry terms to the association  
278 between ethnicity and methylation.

279 **SI Appendix Table 4:** Effect of adding quadratic and cubic ancestry terms to the

280 association between ethnicity and methylation.

281 **SI Appendix Table 5:** Effect of adding genetic principal components 3-10 to the  
282 association between ethnicity and methylation.

283 **SI Appendix Table 6:** Significant associations between ethnicity and methylation ( $p <$   
284  $1.6 \times 10^{-7}$ ), and effect of adjustment for ancestry on the association of ethnicity and  
285 methylation, excluding participants of “Mixed Latino” ethnicity.

286 **SI Appendix Table 7:** Association of ethnicity and methylation in loci previously  
287 associated with maternal smoking during pregnancy.

288 **SI Appendix Table 8:** Significant associations between ethnicity and methylation loci  
289 previously associated with environmental exposures.

290 **SI Appendix Table 9:** Significant associations between global ancestry and  
291 methylation, and effect of adjustment for local ancestry on the association between  
292 global ancestry and methylation.

293 **SI Appendix Table 10:** Significant associations between local ancestry and  
294 methylation (cis- admixture mapping), and effect of adjustment for local ancestry on the  
295 association between global ancestry and methylation.

296 **SI Appendix Table 11:** Significant associations between local ancestry and  
297 methylation (cis- admixture mapping) using the methylation  $\beta$  scale (proportion of DNA  
298 that is methylated), and effect of adjustment for local ancestry on the association  
299 between global ancestry and methylation.

300 **SI Appendix Table 12:** mQTLs within 1 Mb of admixture mapping loci.

301 **SI Appendix Table 13:** mQTLs within 1 Mb of admixture mapping loci on the  $\beta$  scale  
302 and.

### 303 SI Appendix References

- 304 1. Galanter, J. M. *et al.* Development of a panel of genome-wide ancestry informative  
305 markers to study admixture throughout the Americas. *PLoS Genet.* **8**, e1002554  
306 (2012).

- 307 2. Bryc, K. *et al.* Genome-wide patterns of population structure and admixture  
308 among Hispanic/Latino populations. *Proceedings of the National Academy of*  
309 *Sciences* **107**, 8954–8961 (2010).
- 310 3. Moreno-Estrada, A. *et al.* Human genetics. The genetics of Mexico recapitulates  
311 Native American substructure and affects biomedical traits. *Science* **344**, 1280–  
312 1285 (2014).
- 313 4. Patterson, N., Price, A. L. & Reich, D. Population Structure and Eigenanalysis.  
314 *PLoS Genet.* **2**, e190 (2006).
- 315 5. Joubert, B. R. *et al.* 450K epigenome-wide scan identifies differential DNA  
316 methylation in newborns related to maternal smoking during pregnancy. *Environ.*  
317 *Health Perspect.* **120**, 1425–1431 (2012).
- 318 6. Jiang, R., Jones, M. J., Sava, F., Kobor, M. S. & Carlsten, C. Short-term diesel  
319 exhaust inhalation in a controlled human crossover study is associated with  
320 changes in DNA methylation of circulating mononuclear cells in asthmatics. *Part*  
321 *Fibre Toxicol* **11**, 71 (2014).
- 322 7. Chen, W. *et al.* ADCYAP1R1 and asthma in Puerto Rican children. *Am. J. Respir.*  
323 *Crit. Care Med.* **187**, 584–588 (2013).
- 324 8. Ressler, K. J. *et al.* Post-traumatic stress disorder is associated with PACAP and  
325 the PAC1 receptor. *Nature* **470**, 492–497 (2011).
- 326 9. Oh, S. S. *et al.* Effect of secondhand smoke on asthma control among black and  
327 Latino children. *J. Allergy Clin. Immunol.* **129**, 1478–83.e7 (2012).
- 328 10. Du, P. *et al.* Comparison of Beta-value and M-value methods for quantifying  
329 methylation levels by microarray analysis. *BMC Bioinformatics* **11**, 587 (2010).
- 330 11. Hoffmann, T. J. *et al.* Design and coverage of high throughput genotyping arrays  
331 optimized for individuals of East Asian, African American, and Latino  
332 race/ethnicity using imputation and a novel hybrid SNP selection algorithm.  
333 *Genomics* 1–9 (2011). doi:10.1016/j.ygeno.2011.08.007
- 334 12. Alexander, D. H., Novembre, J. & Lange, K. Fast model-based estimation of  
335 ancestry in unrelated individuals. *Genome Research* **19**, 1655–1664 (2009).

- 336 13. Baran, Y. *et al.* Fast and accurate inference of local ancestry in Latino populations.  
337 *Bioinformatics* **28**, 1359–1367 (2012).
- 338 14. Tingley, D., Yamamoto, T., Hirose, K., Keele, L. & Imai, K. mediation: R package  
339 for causal mediation analysis. *UCLA Statistics/American Statistical Association*  
340 (2014).
- 341 15. Nishimura, K. K. *et al.* Early-life air pollution and asthma risk in minority  
342 children. The GALA II and SAGE II studies. *Am. J. Respir. Crit. Care Med.* **188**,  
343 309–318 (2013).
- 344 16. Thakur, N. *et al.* Socioeconomic status and childhood asthma in urban minority  
345 youths. The GALA II and SAGE II studies. *Am. J. Respir. Crit. Care Med.* **188**,  
346 1202–1209 (2013).
- 347 17. Galanter, J. M. *et al.* Genome-wide association study and admixture mapping  
348 identify different asthma-associated loci in Latinos: the Genes-environments &  
349 Admixture in Latino Americans study. *J. Allergy Clin. Immunol.* **134**, 295–305  
350 (2014).
- 351 18. Rosenberg, N. A. *et al.* Genome-wide association studies in diverse populations.  
352 *Nat Rev Genet* **11**, 356–366 (2010).

353
